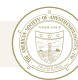

## 2011 ANNUAL JOURNAL SYMPOSIUM

### “Anesthesia and Cancer”

The American Society of Anesthesiologists (ASA) and its journal, *ANESTHESIOLOGY*, announce the 20th annual Journal Symposium, to be held at the ASA Annual Meeting on Monday, October 17, 2011, in Chicago, Illinois. The 2011 Journal Symposium will highlight up-and-coming and noteworthy concepts in anesthesia research and clinical practice.

Cancer recurrence is among the long-term postoperative outcomes that may be influenced by perioperative patient management. This symposium will explore factors that may affect the recurrence of cancer after surgery and how perioperative patient management could influence this outcome.

Three invited speakers will lead the session: Marcel E. Durieux, M.D., Ph.D., Professor of Anesthesiology and Neurological Surgery at the University of Virginia, will provide a scientific overview of possible mechanisms of cancer recurrence; Jonathan Moss, M.D., Ph.D., Professor and Vice Chairman in the Department of Anesthesia and Critical Care at the University of Chicago, will discuss the effect of opioids on tumor growth and metastasis; and Daniel I. Sessler, M.D., Professor and Chair, Department of OUTCOMES RESEARCH at the Cleveland Clinic, will discuss clinical studies of the relationship between anesthetic choices and cancer recurrence.

Investigators from around the world with an interest in this subject are requested to submit their work to the ASA for the Annual Meeting. Abstracts from both basic and clinical sciences are welcome. Studies examining or evaluating mechanisms of cancer recurrence after surgery are encouraged. Abstracts should be submitted *via* the usual online process (which can be accessed through the Web sites [www.asahq.org](http://www.asahq.org) and [www.anesthesiology.org](http://www.anesthesiology.org)). Interested individuals should be sure to check the “Journal Symposium” box on the abstract submission form to be considered for inclusion in this special session. The deadline for abstract submission is March 31, 2011. Abstract selections will be made by the symposium organizers in conjunction with members of the *ANESTHESIOLOGY* Editorial Board.

The authors of abstracts selected for the symposium will be offered an opportunity to submit their work to *ANESTHESIOLOGY* for inclusion in a special issue to be published in the spring of 2012.

## NOMINATIONS SOUGHT FOR MENTORING EXCELLENCE IN RESEARCH AWARD

The Foundation for Anesthesia Education and Research (FAER) is seeking nominations for the 2011 FAER Award for Mentoring Excellence in Research. This award was created to ensure that the value of outstanding mentors is recognized and to encourage, develop, and retain these valuable individuals in our specialty.

The FAER Award for Mentoring Excellence in Research recognizes mentorship rather than scientific accomplishment. Nominees must have mentored anesthesiologists or scientists who have worked in the United States and contributed significantly to the practice. The award is focused on the successful development of mentees, not on the mentor’s professional accomplishments. Nominees should be superior mentors, seen as supporting the future of the specialty.

The deadline for nominations is March 31, 2011. Details on the nomination process and a nomination form are available at [www.f aer.org](http://www.f aer.org).
